# Supplementary material
Source: publisher figshare collection journal article supplement (https://frontiersin.figshare.com/ndownloader/files/14245256)
Supplement: Supplementary file 1 [file 14245256]

**Appendices**

**Table A1. Local authority codes and names in metropolitan areas**

| LA code | LA name | LA code | LA name |
| --- | --- | --- | --- |
| Greater London | | Liverpool | |
| L1 | City of London | LP1 | Halton |
| L2 | Westminster | LP2 | Knowsley |
| L3 | Kensington and Chelsea | LP3 | Liverpool |
| L4 | Hammersmith and Fulham | LP4 | Sefton |
| L5 | Wandsworth | LP5 | St. Helens |
| L6 | Lambeth | LP6 | Wirral |
| L7 | Southwark | Manchester | |
| L8 | Tower Hamlets | M1 | Bolton |
| L9 | Hackney | M2 | Bury |
| L10 | Islington | M3 | Oldham |
| L11 | Camden | M4 | Manchester |
| L12 | Brent | M5 | Rochdale |
| L13 | Ealing | M6 | Salford |
| L14 | Hounslow | M7 | Stockport |
| L15 | Richmond upon Thames | M8 | Tameside |
| L16 | Kingston upon Thames | M9 | Trafford |
| L17 | Merton | M10 | Wigan |
| L18 | Sutton | West Midlands | |
| L19 | Croydon | W1 | Birmingham |
| L20 | Bromley | W2 | Coventry |
| L21 | Lewisham | W3 | Dudley |
| L22 | Greenwich | W4 | Sandwell |
| L23 | Bexley | W5 | Solihull |
| L24 | Havering | W6 | Walsall |
| L25 | Barking and Dagenham | W7 | Wolverhampton |
| L26 | Redbridge |  |  |
| L27 | Newham |  |  |
| L28 | Waltham Forest |  |  |
| L29 | Haringey |  |  |
| L30 | Enfield |  |  |
| L31 | Barnet |  |  |
| L32 | Harrow |  |  |
| L33 | Hillingdon |  |  |

**Table A2. Top 5 most academised local authorities**

| Year | LA name | Academies (%) |
| --- | --- | --- |
| Primary schools | | |
| 2011 | Waltham Forest | 6 |
|  | Enfield | 2 |
|  | Solihull | 2 |
|  | Swindon | 2 |
|  | Cornwall | 2 |
| 2014 | Darlington | 69 |
|  | North East Lincolnshire | 51 |
|  | Thurrock | 46 |
|  | Slough | 44 |
|  | Swindon | 40 |
| 2017 | Poole | 75 |
|  | North East Lincolnshire | 79 |
|  | Bromley | 82 |
|  | Bournemouth | 85 |
|  | Darlington | 86 |
| Secondary schools | | |
| 2011 | Westminster | 40 |
|  | Middlesbrough | 43 |
|  | Solihull | 43 |
|  | North East Lincolnshire | 60 |
|  | Southwark | 69 |
| 2014 | Wakefield | 94 |
|  | Bexley | 100 |
|  | Darlington | 100 |
|  | North East Lincolnshire | 100 |
|  | Rutland | 100 |
| 2017 | Leicestershire | 96 |
|  | Bexley | 100 |
|  | Blackpool | 100 |
|  | Darlington | 100 |
|  | North East Lincolnshire | 100 |
